# Supplementary material
Source: Springer Nature journal article supplement (https://www.springermedizin.de/resource/supplementary/12947_2010_372_MOESM6_ESM.pdf/9556828)
Supplement: MOESM6 [file 9556828]

**A****antero-septal**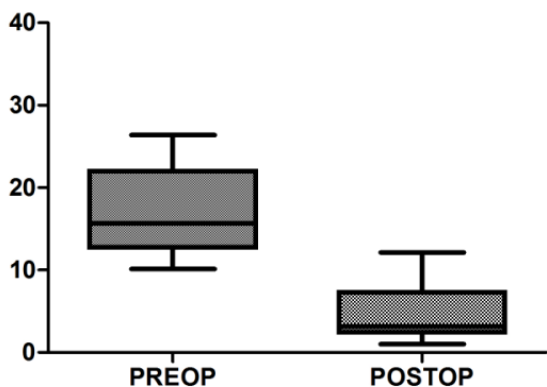

Preop: Lower 95% CI 14.9 / Upper 95% CI 19.6  
 Postop: Lower 95% CI 3.3/ Upper 95% CI 6.0

**B****inferior**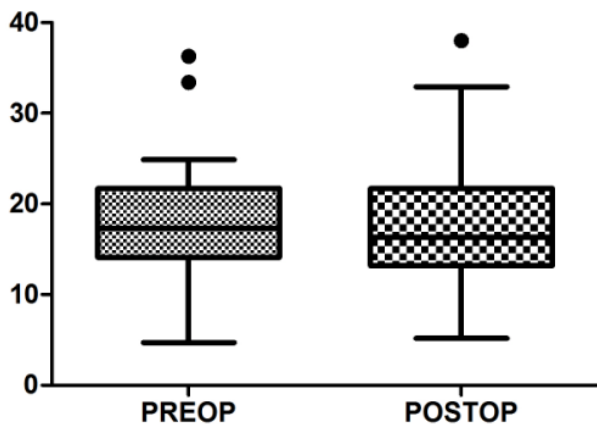

Preop: Lower 95% CI 14.7 / Upper 95% CI 21.9  
 Postop: Lower 95% CI 14.3/ Upper 95% CI 21.8
